# Supplementary material
Source: PubMed Central journal article supplement (PMC3854948)
Supplement: NIHMS506003-supplement-Supporting_Material.pdf [file NIHMS506003-supplement-Supporting_Material.pdf]

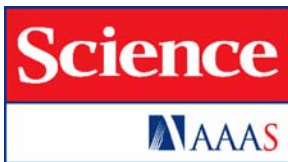

## Supporting Online Material for

### **Genome Project Standards in a New Era of Sequencing**

P. S. G. Chain,\* D. V. Grafham,\* R. S. Fulton, M. G. FitzGerald, J. Hostetler, D. Muzny, J. Ali, B. Birren, D. C. Bruce, C. Buhay, J. R. Cole, Y. Ding, S. Dugan, D. Field, G. M. Garrity, R. Gibbs, T. Graves, C. S. Han, S. H. Harrison, S. Highlander, P. Hugenholtz, H. M. Khouri, C. D. Kodira, E. Kolker, N. C. Kyrpides, D. Lang, A. Lapidus, S. A. Malfatti, V. Markowitz, T. Metha, K. E. Nelson, J. Parkhill, S. Pitluck, X. Qin, T. D. Read, J. Schmutz, S. Sozhamannan, P. Sterk, R. L. Strausberg, G. Sutton, N. R. Thomson, J. M. Tiedje, G. Weinstock, A. Wollam, Genomic Standards Consortium, Human Microbiome Project Jumpstart Consortium, J. C. Detter

\*To whom correspondence should be addressed. E-mail: pchain@lanl.gov (P.S.G.C.);  
dgl@sanger.ac.uk (D.G.)

Published 9 October 2009, *Science* **326**, 236 (2009)  
DOI: 10.1126/science.1180614

#### **This PDF file includes**

SOM Text

## Authors and their affiliations

P. S. G. Chain,<sup>1,2,3,4,\*†</sup> D. V. Grafham,<sup>5\*</sup> R. S. Fulton,<sup>6\*</sup> M. G. FitzGerald,<sup>7\*</sup> J. Hostetler,<sup>8\*</sup> D. Muzny,<sup>9\*</sup> J. Ali,<sup>10</sup> B. Birren,<sup>7</sup> D. C. Bruce,<sup>1,11</sup> C. Buhay,<sup>9</sup> J. R. Cole,<sup>3,4</sup> Y. Ding,<sup>9</sup> S. Dugan,<sup>9</sup> D. Field,<sup>12</sup> G. M. Garrity,<sup>3,4</sup> R. Gibbs,<sup>9</sup> T. Graves,<sup>6</sup> C. S. Han,<sup>1,11</sup> S. H. Harrison,<sup>3‡</sup> S. Highlander,<sup>9</sup> P. Hugenholtz,<sup>1</sup> H. M. Khouri,<sup>13</sup> C. D. Kodira,<sup>7</sup> E. Kolker,<sup>14,15</sup> N. C. Kyrpides,<sup>1</sup> D. Lang,<sup>1,2</sup> A. Lapidus,<sup>1</sup> S. A. Malfatti,<sup>1,2</sup> V. Markowitz,<sup>16</sup> T. Metha,<sup>7</sup> K. E. Nelson,<sup>8</sup> J. Parkhill,<sup>5</sup> S. Pitluck,<sup>1</sup> X. Qin,<sup>9</sup> T. D. Read,<sup>17</sup> J. Schmutz,<sup>18</sup> S. Sozhamannan,<sup>19</sup> P. Sterk,<sup>12</sup> R. L. Strausberg,<sup>8</sup> G. Sutton,<sup>8</sup> N. R. Thomson,<sup>5</sup> J. M. Tiedje,<sup>3,4</sup> G. Weinstock,<sup>6</sup> A. Wollam,<sup>6</sup> Genomic Standards Consortium, Human Microbiome Project Jumpstart Consortium, J. C. Detter,<sup>11\*§</sup>

<sup>1</sup>U.S. Department of Energy Joint Genome Institute, Walnut Creek, CA 94598, USA.

<sup>2</sup>Biosciences and Biotechnology Division, Lawrence Livermore National Laboratory, Livermore, CA 94550, USA.

<sup>3</sup>Microbiology and Molecular Genetics, Michigan State University, East Lansing, MI 48824, USA.

<sup>4</sup>Center for Microbial Ecology, Michigan State University, East Lansing, MI 48824, USA.

<sup>5</sup>The Sanger Institute, Wellcome Trust Genome Campus, Hinxton, Cambridge, CB10 1SA, UK.

<sup>6</sup>The Genome Center, Washington University School of Medicine, St. Louis, MO 63108, USA.

<sup>7</sup>The Broad Institute of Massachusetts Institute of Technology and Harvard, Cambridge, MA 02141, USA.

<sup>8</sup>J. Craig Venter Institute, Rockville, MD 20850, USA.

<sup>9</sup>Human Genome Sequencing Center, Baylor College of Medicine, Houston, TX 77030, USA.

<sup>10</sup>Ontario Institute for Cancer Research, Toronto, Ontario M5G 0A3, Canada.

<sup>11</sup>Bioscience Division, Los Alamos National Laboratory, Los Alamos, NM 87545, USA.

<sup>12</sup>Natural Environmental Research Council Centre for Ecology and Hydrology, Oxford, Oxfordshire, OX1 3SR, UK.

<sup>13</sup>National Center for Biotechnology Information, National Library of Medicine, Rockville, MD 20850, USA.

<sup>14</sup>Seattle Children's Hospital and Research Institute, Seattle, WA 98101, USA.

<sup>15</sup>Biomedical & Health Informatics Division, Department of Medical Education and Biotechnology Informatics, University of Washington School of Medicine, Seattle, WA 98195, USA.

<sup>16</sup>Biological Data Management and Technology Center, Lawrence Berkeley National Laboratory, Berkeley, CA 94720, USA.

<sup>17</sup>Emory GRA (Georgia Research Alliance) Genomics Center, Emory University School of Medicine, Atlanta, GA 30322, USA.

<sup>18</sup>HudsonAlpha Genome Sequencing Center, HudsonAlpha Institute, Huntsville, AL 35806, USA.

<sup>19</sup>Biological Defense Research Directorate, Naval Medical Research Center, Silver Spring, MD 20910, USA.

\*Finishing in the Future Working Group members.

†Present address: Bioscience Division, Los Alamos National Laboratory, Los Alamos, NM 87545, USA.

‡Present address: Department of Biological Sciences, Wayne State University, Detroit, MI 48202, USA.

§Present address: 454 Life Sciences, Branford, CT 06405, USA.
